# Supplementary material
Source: PubMed Central journal article supplement (PMC6279085)
Supplement: jjy002_suppl_supplementary_table_6.pdf [file jjy002_suppl_supplementary_table_6.pdf]

Supplementary Table 6. Significant associations observed in the trans-ethnic meta-analysis.

| SNP          | Chr | Position    | Genes in locus                                                                                                                                                                                                                                                                                     | AI | A2 | CD       |      |          |            |      |          |        |      |          | UC       |      |          |            |      |          |        |      |          | IBD      |      |          |            |      |          |        |      |          | MANTRA |      |       |      |       |      |      |          |          | METAL |          |          |      |          |          |     |    |   |
|--------------|-----|-------------|----------------------------------------------------------------------------------------------------------------------------------------------------------------------------------------------------------------------------------------------------------------------------------------------------|----|----|----------|------|----------|------------|------|----------|--------|------|----------|----------|------|----------|------------|------|----------|--------|------|----------|----------|------|----------|------------|------|----------|--------|------|----------|--------|------|-------|------|-------|------|------|----------|----------|-------|----------|----------|------|----------|----------|-----|----|---|
|              |     |             |                                                                                                                                                                                                                                                                                                    |    |    | European |      |          | East Asian |      |          | Korean |      |          | European |      |          | East Asian |      |          | Korean |      |          | European |      |          | East Asian |      |          | Korean |      |          | CD     |      |       | UC   |       |      | IBD  |          |          | CD    |          |          | UC   |          |          | IBD |    |   |
|              |     |             |                                                                                                                                                                                                                                                                                                    |    |    | OR       | se   | P        | OR         | se   | P        | OR     | se   | P        | OR       | se   | P        | OR         | se   | P        | OR     | se   | P        | OR       | se   | P        | OR         | se   | P        | OR     | se   | P        | OR     | se   | P     | OR   | se    | P    | OR   | se       | P        | OR    | se       | P        | OR   | se       | P        | OR  | se | P |
| IBD: 22 loci |     |             |                                                                                                                                                                                                                                                                                                    |    |    |          |      |          |            |      |          |        |      |          |          |      |          |            |      |          |        |      |          |          |      |          |            |      |          |        |      |          |        |      |       |      |       |      |      |          |          |       |          |          |      |          |          |     |    |   |
| rs1121129    | 1   | 8,268,095   | VAMP3,UTS2,PARK7,ERRF1,PER3,TNFRSF9,CAMTA1                                                                                                                                                                                                                                                         | A  | G  | 0.94     | 0.01 | 1.77E-05 | 0.92       | 0.05 | 1.13E-01 | 1.12   | 0.08 | 1.75E-01 | 0.94     | 0.01 | 3.16E-06 | 1.00       | 0.06 | 9.54E-01 | 1.02   | 0.08 | 8.00E-01 | 0.94     | 0.01 | 8.88E-09 | 0.95       | 0.04 | 2.48E-01 | 1.07   | 0.07 | 3.40E-01 | 3.42   | 0.21 | 3.80  | 0.12 | 6.47  | 0.18 | 0.95 | 1.83E-05 | 1.10E-01 | 0.94  | 9.76E-06 | 3.28E-01 | 0.94 | 1.85E-08 | 1.59E-01 |     |    |   |
| rs3811406    | 1   | 151,254,041 | RORC                                                                                                                                                                                                                                                                                               | A  | G  | 0.93     | 0.01 | 3.54E-06 | 0.92       | 0.04 | 5.23E-02 | 0.98   | 0.07 | 7.70E-01 | 0.93     | 0.02 | 8.03E-07 | 0.99       | 0.05 | 8.81E-01 | 1.07   | 0.07 | 3.32E-01 | 0.93     | 0.01 | 4.62E-09 | 0.95       | 0.04 | 1.47E-01 | 1.03   | 0.06 | 6.61E-01 | 3.34   | 0.09 | 3.75  | 0.30 | 6.94  | 0.10 | 0.93 | 6.35E-07 | 7.60E-01 | 0.94  | 7.66E-06 | 7.08E-02 | 0.94 | 5.41E-09 | 2.72E-01 |     |    |   |
| rs11264305   | 1   | 155,033,572 | 201K10.3,TRIM46,THBS3,GBA,FAM189B,CLK2,HCN3,PKLR,FDPS,YYIAP1,DAP3,GON4L,RTT1,KIAA0907,UBQLN4,EFNA3,EFNA3,ASH1L,MSTO1,SYT11,ARHGAP2                                                                                                                                                                 | A  | G  | 0.93     | 0.01 | 1.27E-07 | 0.84       | 0.14 | 2.21E-01 | 0.83   | 0.27 | 4.73E-01 | 0.96     | 0.01 | 1.06E-03 | 0.65       | 0.17 | 1.29E-02 | 0.94   | 0.25 | 8.07E-01 | 0.94     | 0.01 | 1.47E-08 | 0.77       | 0.12 | 3.25E-02 | 0.89   | 0.21 | 5.63E-01 | 5.88   | 0.18 | 2.14  | 0.39 | 6.98  | 0.23 | 0.93 | 6.46E-08 | 7.03E-01 | 0.95  | 5.18E-04 | 8.58E-02 | 0.94 | 4.60E-09 | 2.66E-01 |     |    |   |
| rs1202890    | 1   | 198,808,280 | PTPRC                                                                                                                                                                                                                                                                                              | A  | G  | 0.95     | 0.02 | 3.63E-04 | 1.13       | 0.04 | 2.64E-03 | 1.04   | 0.07 | 5.34E-01 | 0.94     | 0.02 | 2.51E-04 | 1.13       | 0.05 | 1.05E-02 | 1.04   | 0.07 | 5.50E-01 | 0.95     | 0.01 | 1.03E-05 | 1.14       | 0.04 | 2.18E-04 | 1.04   | 0.06 | 4.60E-01 | 2.38   | 0.98 | 2.11  | 0.94 | 6.15  | 1.00 | 0.97 | 2.96E-02 | 1.66E-04 | 0.96  | 1.27E-02 | 8.71E-04 | 0.97 | 6.58E-03 | 1.94E-06 |     |    |   |
| rs12137256   | 1   | 200,679,613 | C1orf106,KIF21B,CACNA1S                                                                                                                                                                                                                                                                            | A  | G  | 1.06     | 0.01 | 9.66E-06 | 1.01       | 0.05 | 8.13E-01 | 0.91   | 0.09 | 2.57E-01 | 1.06     | 0.01 | 3.09E-06 | 0.87       | 0.06 | 1.30E-02 | 1.03   | 0.09 | 7.18E-01 | 1.06     | 0.01 | 1.54E-09 | 0.95       | 0.05 | 2.86E-01 | 0.97   | 0.07 | 6.49E-01 | 3.17   | 0.18 | 3.62  | 0.84 | 6.49  | 0.48 | 1.05 | 3.16E-05 | 1.65E-01 | 1.05  | 5.95E-05 | 2.56E-03 | 1.06 | 3.05E-08 | 2.80E-02 |     |    |   |
| rs2165738    | 2   | 24,692,809  | POMC,ADCY3,DNAJC2,EFEB3B,DNMT3A                                                                                                                                                                                                                                                                    | C  | G  | 0.90     | 0.01 | 5.94E-14 | 1.01       | 0.04 | 7.35E-01 | 0.88   | 0.07 | 8.15E-02 | 0.96     | 0.01 | 1.11E-03 | 1.00       | 0.05 | 9.54E-01 | 0.96   | 0.07 | 6.01E-01 | 0.93     | 0.01 | 4.58E-11 | 1.01       | 0.04 | 8.06E-01 | 0.93   | 0.06 | 1.78E-01 | 11.03  | 0.25 | 1.78  | 0.08 | 8.40  | 0.17 | 0.91 | 4.34E-13 | 2.94E-02 | 0.96  | 1.43E-03 | 6.89E-01 | 0.94 | 2.17E-10 | 8.53E-02 |     |    |   |
| rs1125883    | 2   | 61,710,573  | PUS10                                                                                                                                                                                                                                                                                              | A  | C  | 0.93     | 0.01 | 3.47E-09 | 0.95       | 0.04 | 1.86E-01 | 0.87   | 0.07 | 5.68E-02 | 0.94     | 0.01 | 5.46E-06 | 0.99       | 0.05 | 9.09E-01 | 0.93   | 0.07 | 2.83E-01 | 0.93     | 0.01 | 4.91E-11 | 0.96       | 0.04 | 3.00E-01 | 0.90   | 0.06 | 7.27E-02 | 8.06   | 0.07 | 3.97  | 0.07 | 9.43  | 0.06 | 0.93 | 3.56E-10 | 6.26E-01 | 0.95  | 5.59E-06 | 5.46E-01 | 0.94 | 9.71E-12 | 5.72E-01 |     |    |   |
| rs868891     | 3   | 49,949,071  | TMA7,TREX1,UCN2,TMEM89,SLC26A6,WDR6,NDUFA3,IMPDH2,KLHDC8B,RP11-3B7.1,C3orf62,GPXI,TCTA,AMT,APEH,PLXNB1,CCDC51,SHISA5,PFKB4,UQCRC1,CELSR3,NCKIPSD,PRKAR2A,SLC25A20,ARIH2OS,P4HTM,DALRD3,QRICH1,QARS,LAMB2,CCDC71,C3orf84,USP4,NICN1,MST1,RFNF123,ATRP,COL7A1,IP6K2,ARIH2,USP19,RHOA,DAG1,BSN,CCDC36 | A  | G  | 1.07     | 0.01 | 9.73E-09 | 1.06       | 0.06 | 3.68E-01 | 1.01   | 0.10 | 9.48E-01 | 1.12     | 0.01 | 1.03E-17 | 0.90       | 0.07 | 1.18E-01 | 0.99   | 0.10 | 9.37E-01 | 1.09     | 0.01 | 5.52E-18 | 0.99       | 0.05 | 8.91E-01 | 1.00   | 0.08 | 9.92E-01 | 6.81   | 0.10 | 14.46 | 0.84 | 14.88 | 0.21 | 1.07 | 8.03E-09 | 8.02E-01 | 1.11  | 8.72E-16 | 3.70E-03 | 1.09 | 5.06E-17 | 1.11E-01 |     |    |   |
| rs2624435    | 5   | 17,095,269  | MYO10, BASP1                                                                                                                                                                                                                                                                                       | A  | G  | 0.96     | 0.01 | 2.56E-03 | 0.90       | 0.06 | 9.91E-02 | 1.05   | 0.10 | 6.28E-01 | 0.93     | 0.01 | 3.64E-06 | 0.89       | 0.07 | 9.30E-02 | 0.80   | 0.10 | 2.82E-02 | 0.94     | 0.01 | 1.93E-07 | 0.89       | 0.05 | 3.54E-02 | 0.92   | 0.08 | 2.87E-01 | 1.82   | 0.11 | 5.04  | 0.17 | 6.32  | 0.09 | 0.96 | 1.36E-03 | 4.09E-01 | 0.93  | 2.80E-07 | 2.59E-01 | 0.94 | 1.80E-08 | 6.19E-01 |     |    |   |
| rs1070444    | 5   | 40,839,644  |                                                                                                                                                                                                                                                                                                    | A  | G  | 1.17     | 0.02 | 2.15E-23 | 0.89       | 0.12 | 3.38E-01 | 0.95   | 0.24 | 8.25E-01 | 1.05     | 0.02 | 5.20E-03 | 0.81       | 0.14 | 1.29E-01 | 0.67   | 0.26 | 1.31E-01 | 1.11     | 0.01 | 8.35E-16 | 0.86       | 0.10 | 1.23E-01 | 0.80   | 0.20 | 2.80E-01 | 20.30  | 0.53 | 1.05  | 0.55 | 12.92 | 0.80 | 1.17 | 2.77E-22 | 4.91E-02 | 1.04  | 1.29E-02 | 4.50E-02 | 1.11 | 1.53E-14 | 9.67E-03 |     |    |   |
| rs2299004    | 5   | 132,057,838 | IL3,CSF2,HINT1,LYRM7,SLC22A4,C5orf56,IRF1,CDCA42SE2,RAPGEF6,ACSL6,P4HA2,PDLIM4,SLC22A5,CTC-432M15.3,FNIP1                                                                                                                                                                                          | A  | G  | 1.08     | 0.01 | 9.22E-09 | 0.98       | 0.05 | 7.12E-01 | 0.98   | 0.10 | 8.28E-01 | 1.07     | 0.01 | 6.89E-06 | 1.05       | 0.06 | 4.09E-01 | 1.08   | 0.09 | 4.35E-01 | 1.08     | 0.01 | 3.63E-11 | 1.00       | 0.04 | 9.21E-01 | 1.03   | 0.08 | 7.19E-01 | 5.77   | 0.27 | 4.14  | 0.08 | 8.43  | 0.15 | 1.07 | 8.15E-08 | 1.10E-01 | 1.07  | 3.69E-06 | 9.55E-01 | 1.07 | 1.43E-10 | 2.44E-01 |     |    |   |
| rs35227902   | 5   | 158,545,371 | UBLCP1,IL12B                                                                                                                                                                                                                                                                                       | A  | C  | 1.09     | 0.01 | 9.50E-11 | 1.12       | 0.04 | 7.33E-03 | 1.09   | 0.07 | 2.34E-01 | 1.09     | 0.01 | 6.17E-09 | 1.00       | 0.05 | 9.38E-01 | 0.98   | 0.07 | 8.13E-01 | 1.09     | 0.01 | 1.33E-15 | 1.07       | 0.03 | 5.83E-02 | 1.03   | 0.06 | 5.80E-01 | 10.49  | 0.08 | 6.00  | 0.21 | 13.93 | 0.07 | 1.09 | 1.35E-12 | 8.76E-01 | 1.08  | 5.72E-08 | 1.12E-01 | 1.09 | 3.77E-16 | 4.96E-01 |     |    |   |
| rs3780383    | 9   | 5,232,409   |                                                                                                                                                                                                                                                                                                    | C  | G  | 0.90     | 0.01 | 1.34E-15 | 0.91       | 0.05 | 8.71E-02 | 0.86   | 0.09 | 9.84E-02 | 0.90     | 0.01 | 7.12E-14 | 0.74       | 0.06 | 5.46E-08 | 0.67   | 0.09 | 4.83E-06 | 0.90     | 0.01 | 5.25E-22 | 0.84       | 0.04 | 8.25E-05 | 0.75   | 0.08 | 1.43E-04 | 14.48  | 0.08 | 20.26 | 1.00 | 24.71 | 0.34 | 0.90 | 9.00E-17 | 8.47E-01 | 0.89  | 5.70E-20 | 1.20E-05 | 0.89 | 6.43E-27 | 2.27E-02 |     |    |   |
| rs10982385   | 9   | 117,493,017 | TNFSF15,TNFSF8                                                                                                                                                                                                                                                                                     | A  | C  | 0.97     | 0.01 | 2.84E-02 | 1.30       | 0.05 | 1.33E-08 | 1.50   | 0.07 | 4.13E-08 | 0.99     | 0.01 | 6.87E-01 | 1.03       | 0.05 | 5.29E-01 | 1.15   | 0.07 | 4.07E-02 | 0.98     | 0.01 | 9.78E-02 | 1.19       | 0.04 | 7.32E-06 | 1.30   | 0.06 | 5.79E-06 | 12.64  | 1.00 | -0.57 | 0.23 | 8.03  | 1.00 | 1.00 | 7.17E-01 | 2.78E-15 | 1.00  | 8.89E-01 | 9.41E-02 | 1.00 | 6.96E-01 | 4.01E-10 |     |    |   |
| rs2074023    | 11  | 2,325,581   | TSPAN32                                                                                                                                                                                                                                                                                            | A  | G  | 0.95     | 0.01 | 1.04E-05 | 0.87       | 0.05 | 3.69E-03 | 0.82   | 0.09 | 2.56E-02 | 0.94     | 0.01 | 1.73E-05 | 0.88       | 0.06 | 1.69E-02 | 0.93   | 0.08 | 3.61E-01 | 0.95     | 0.01 | 1.71E-07 | 0.87       | 0.04 | 8.45E-04 | 0.88   | 0.07 | 6.08E-02 | 5.66   | 0.32 | 4.38  | 0.09 | 7.49  | 0.26 | 0.94 | 1.48E-07 | 7.31E-02 | 0.94  | 1.44E-06 | 4.13E-01 | 0.94 | 1.05E-09 | 9.23E-02 |     |    |   |
| rs12928665   | 16  | 10,971,474  | CITA                                                                                                                                                                                                                                                                                               | A  | G  | 0.94     | 0.01 | 6.61E-06 | 0.81       | 0.04 | 1.07E-06 | 0.90   | 0.07 | 1.40E-01 | 0.94     | 0.01 | 2.36E-05 | 0.85       | 0.05 | 8.92E-04 | 0.82   | 0.07 | 4.46E-03 | 0.94     | 0.01 | 1.29E-08 | 0.83       | 0.04 | 1.29E-07 | 0.86   | 0.06 | 8.23E-03 | 7.76   | 0.74 | 6.35  | 0.52 | 12.60 | 0.91 | 0.93 | 2.22E-09 | 5.23E-03 | 0.93  | 4.50E-08 | 2.92E-02 | 0.92 | 1.23E-13 | 2.14E-03 |     |    |   |
| rs7187575    | 16  | 28,990,101  | IL27,NUPRI1,TUFM,NPIP6,EIF3CL,NPIP7,CLN3,CLN3,APOBR,SULT1A2,SULT1A1,NPIP8,NPIP9,SH2B1,ATP2A1,RABEP2,CD19,CCDC101,EIF3C,ATXN2L                                                                                                                                                                      | A  | G  | 0.91     | 0.01 | 3.00E-12 | 0.85       | 0.07 | 3.12E-02 | 0.79   | 0.12 | 4.81E-02 | 0.95     | 0.01 | 7.23E-04 | 0.88       | 0.09 | 1.24E-01 | 0.93   | 0.12 | 5.26E-01 | 0.93     | 0.01 | 3.03E-11 | 0.86       | 0.06 | 2.08E-02 | 0.86   | 0.10 | 1.23E-01 | 11.43  | 0.17 | 2.37  | 0.13 | 10.48 | 0.13 | 0.91 | 1.14E-13 | 3.45E-01 | 0.95  | 2.83E-04 | 6.01E-01 | 0.93 | 1.58E-12 | 3.80E-01 |     |    |   |
| rs55891358   | 17  | 32,530,959  | AC00549.3,CCL2,CCL7,CCL11                                                                                                                                                                                                                                                                          | A  | G  | 0.88     | 0.02 | 3.48E-14 | 0.99       | 0.08 | 8.99E-01 | 0.99   | 0.15 | 9.56E-01 | 0.94     | 0.02 | 6.22E-04 | 0.92       | 0.10 | 3.79E-01 | 0.89   | 0.15 | 4.43E-01 | 0.91     | 0.01 | 1.30E-12 | 0.97       | 0.07 | 6.22E-01 | 0.94   | 0.12 | 6.10E-01 | 11.37  | 0.20 | 2.33  | 0.12 | 10.43 | 0.15 | 0.89 | 1.21E-13 | 2.91E-01 | 0.94  | 3.35E-04 | 9.00E-01 | 0.91 | 1.52E-12 | 6.69E-01 |     |    |   |
| rs4794823    | 17  | 38,166,265  | GSDMB,ORMDL3,LRR3C,GRB7,ZBP2,GSDMA,IKZF3                                                                                                                                                                                                                                                           | A  | T  | 1.06     | 0.01 | 2.16E-06 | 1.05       | 0.04 | 2.61E-01 | 1.02   | 0.07 | 7.62E-01 | 1.07     | 0.01 | 1.48E-07 | 1.01       | 0.05 | 8.90E-01 | 0.99   | 0.07 | 8.97E-01 | 1.07     | 0.01 | 2.16E-10 | 1.03       | 0.04 | 4.57E-01 | 1.01   | 0.05 | 9.23E-01 | 4.64   | 0.07 | 5.03  | 0.16 | 7.95  | 0.12 | 1.06 | 1.32E-06 | 8.18E-01 | 1.06  | 6.24E-07 | 2.45E-01 | 1.06 | 5.14E-10 | 3.24E-01 |     |    |   |
| rs730086     | 17  | 40,271,757  | NAGLU,STAT5A,PTFR,STAT5B,STAT3,ATP6V0A1                                                                                                                                                                                                                                                            | A  | G  | 0.93     | 0.01 | 1.01E-07 | 0.86       | 0.06 | 7.09E-03 | 0.82   | 0.11 | 6.17E-02 | 0.95     | 0.01 | 5.55E-05 | 0.89       | 0.06 | 6.74E-02 | 0.77   | 0.10 | 1.36E-02 | 0.93     | 0.01 | 4.13E-10 | 0.87       | 0.05 | 2.22E-03 | 0.79   | 0.09 | 7.38E-03 | 7.38   | 0.21 | 4.20  | 0.26 | 10.39 | 0.35 | 0.93 | 2.23E-09 | 1.89E-01 | 0.94  | 4.16E-06 | 1.05E-01 | 0.93 | 1.75E-12 | 5.36E-02 |     |    |   |
| rs1297247    | 21  | 16,736,037  |                                                                                                                                                                                                                                                                                                    | A  | C  | 0.92     | 0.01 | 1.96E-11 | 0.95       | 0.05 | 3.43E-01 | 0.96   | 0.10 | 6.73E-01 | 0.93     |      |          |            |      |          |        |      |          |          |      |          |            |      |          |        |      |          |        |      |       |      |       |      |      |          |          |       |          |          |      |          |          |     |    |   |
